# Supplementary material for: Study on Pharmacokinetics and Metabolic Profiles of Novel Potential PLK-1 Inhibitors by UHPLC-MS/MS Combined with UHPLC-Q-Orbitrap/HRMS
Source: MDPI journal article supplement (doi:10.3390/molecules28062550), 2023-03-10
Supplement: s1 [file s1]

## *Supplemental Materials*

### **Study on pharmacokinetics and metabolic profiles of novel potential PLK-1 inhibitors by UHPLC-MS/MS combined with UHPLC-Q- Orbitrap/HRMS**

Lin Wang, Hui Lei, Jing Lu, Xinfu Bai, Wenyan Wang, Chunjiao Liu, Yunjie Wang, Yifei  
Yang, Fangxia Zou, Liang Ye, Hongbo Wang, Jingwei Tian, Jianzhao Zhang

## Results

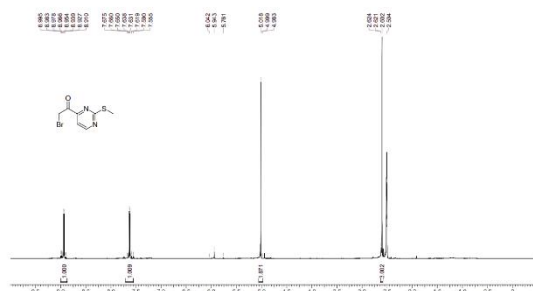

**Figure S1.**  $^1\text{H}$  NMR (400MHz, DMSO- $d_6$ ) spectrum of compound **2**:  $\delta$  8.93 (d,  $J$  = 5.20 Hz, 1 H), 7.60 - 7.66 (m, 1 H), 5.02 (s, 2 H), 2.57 - 2.64 (m, 3 H).

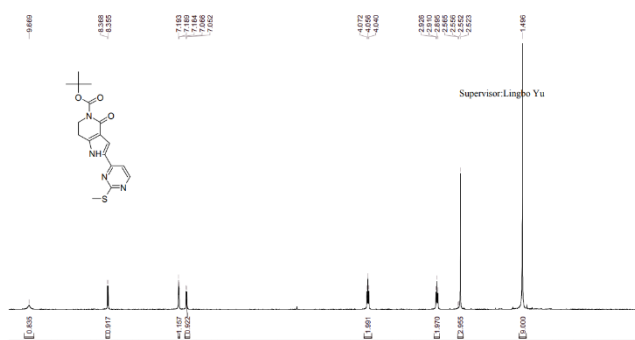

**Figure S2.**  $^1\text{H}$  NMR (400MHz,  $\text{CDCl}_3$ ) spectrum of compound **3**:  $\delta$  9.67 (br s, 1 H), 8.36 (d,  $J$  = 5.20 Hz, 1 H), 7.13 - 7.25 (m, 1 H), 7.06 (d,  $J$  = 5.20 Hz, 1 H), 4.06 (t,  $J$  = 6.40 Hz, 2 H), 2.91 (t,  $J$  = 6.40 Hz, 2 H), 2.50 - 2.57 (m, 3 H), 1.50 (s, 9 H).

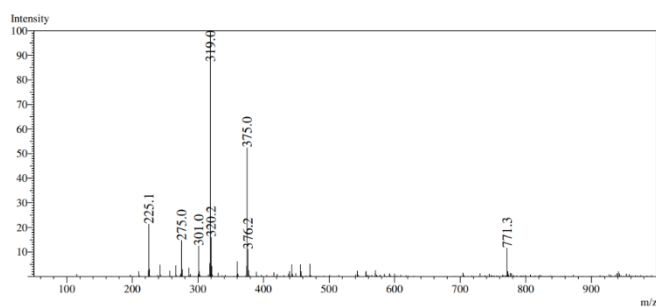

**Figure S3.** Mass spectrum of compound **4** ( $m/z$  375.0).

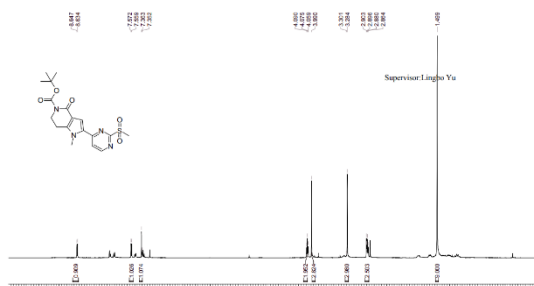

**Figure S4.**  $^1\text{H}$  NMR (400MHz,  $\text{CDCl}_3$ ) spectrum of compound **5**:  $\delta$  8.64 (d,  $J$  = 5.60 Hz, 1 H), 7.57 (d,  $J$  = 5.60 Hz, 1 H), 7.33 - 7.41 (m, 1 H), 4.07 (t,  $J$  = 6.20 Hz, 2 H), 3.99 (s, 3 H), 3.28 (s, 3 H), 2.85 - 2.94 (m, 3 H), 1.50 (s, 9 H).

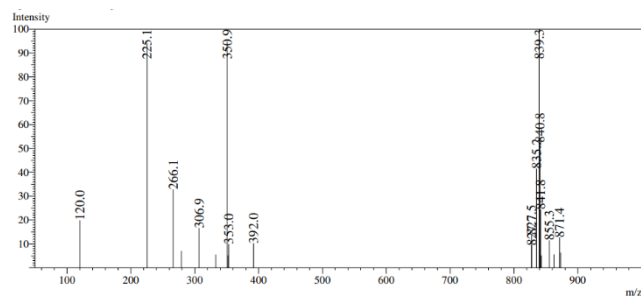

Figure S5. Mass spectrum of compound **5** ( $m/z$  306.9).

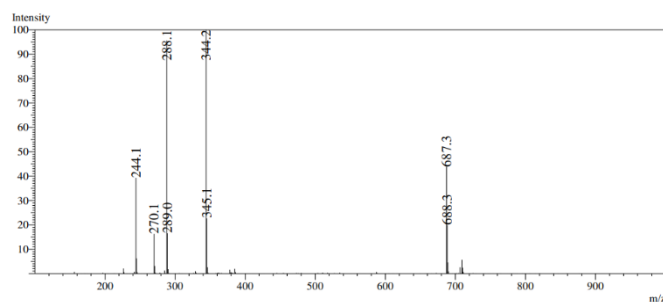

Figure S6. Mass spectrum of compound **6** ( $m/z$  344.2).

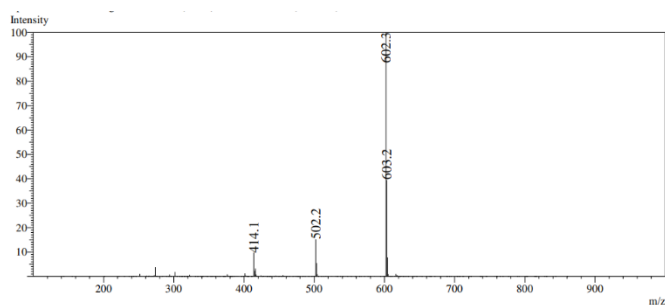

Figure S7. Mass spectrum of compound **7** ( $m/z$  602.3).

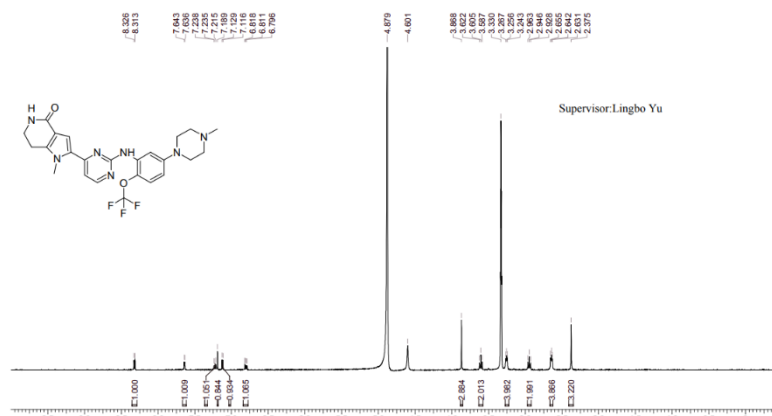

Figure S8.  $^1\text{H}$  NMR (400MHz, METHANOL- $d_4$ ) spectrum of compound **25**:  $\delta$  8.32 (d,  $J$  = 5.60 Hz, 1 H), 7.64 (d,  $J$  = 2.80 Hz, 1 H), 7.21 - 7.24 (m, 1 H), 7.19 (s, 1 H), 7.12 (d,  $J$  = 5.20 Hz, 1 H), 6.80 (dd,  $J$  = 9.20, 2.89 Hz, 1 H), 4.60 (s, 5 H), 3.87 (s, 3 H), 3.60 (t,  $J$  = 7.20 Hz, 2 H), 3.23 - 3.27 (m, 4 H), 2.95 (t,  $J$  = 7.20 Hz, 2 H), 2.62 - 2.66 (m, 4 H), 2.37 (s, 3 H).

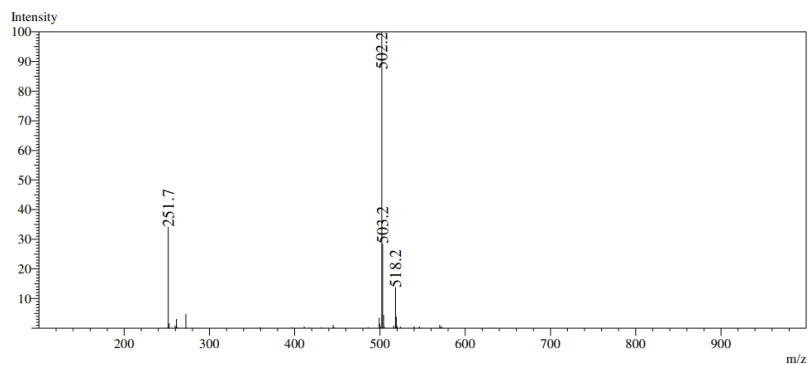

**Figure S9.** Mass spectrum of compound **25** ( $m/z$  502.2).

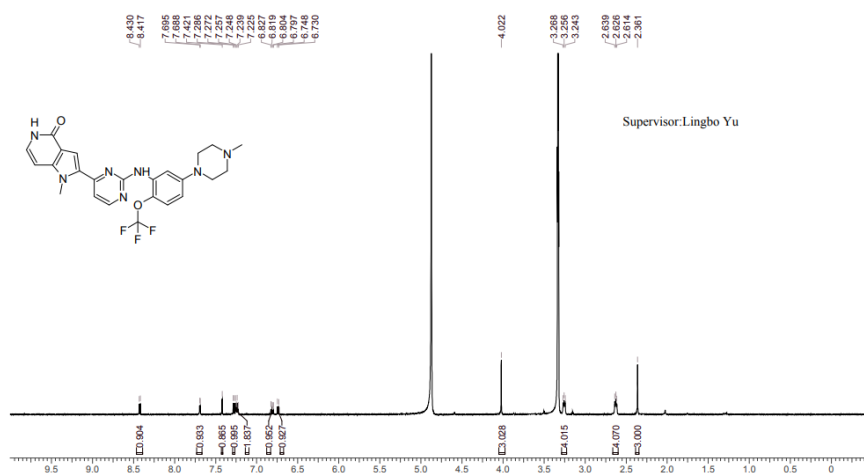

**Figure S10.**  $^1\text{H}$  NMR (400MHz, METHANOL- $d_4$ ) spectrum of compound **7a**:  $\delta$  8.42 (d,  $J$  = 5.20 Hz, 1 H) 7.69 (d,  $J$  = 2.80 Hz, 1 H), 7.42 (s, 1 H), 7.28 (d,  $J$  = 5.20 Hz, 1 H), 7.22 - 7.26 (m, 2 H), 6.81 (dd,  $J$  = 9.20, 3.01 Hz, 1 H), 6.74 (d,  $J$  = 7.20 Hz, 1 H), 4.02 (s, 3 H), 3.23 - 3.28 (m, 4 H), 2.61 - 2.65 (m, 4 H), 2.36 (s, 3 H).

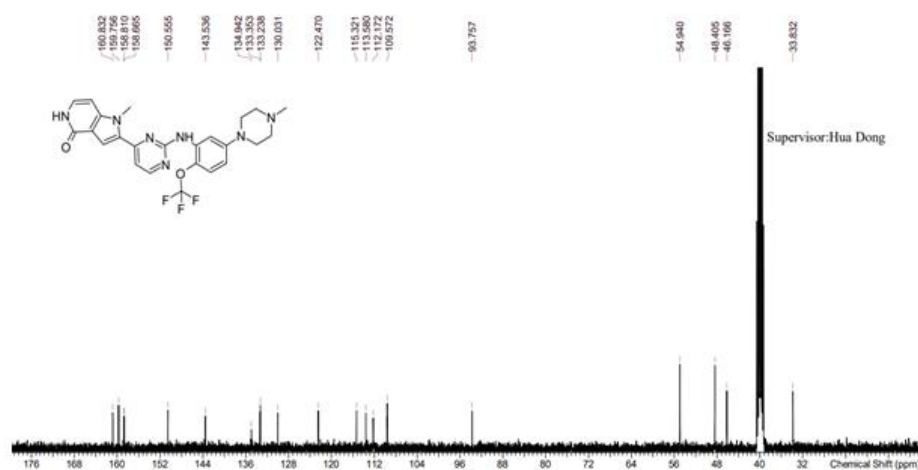

**Figure S11.**  $^{13}\text{C}$  NMR (400MHz, DMSO) spectrum of compound **7a**:  $\delta$  160.8 ppm, 159.8 ppm, 158.8 ppm, 158.7 ppm, 150.6 ppm, 143.5 ppm, 134.9 ppm, 133.4 ppm, 133.2 ppm, 130.0 ppm, 122.5 ppm, 115.3 ppm, 113.6 ppm, 112.2 ppm, 109.6 ppm, 93.76 ppm, 52.94 ppm, 48.40 ppm, 46.17 ppm, 33.83 ppm.

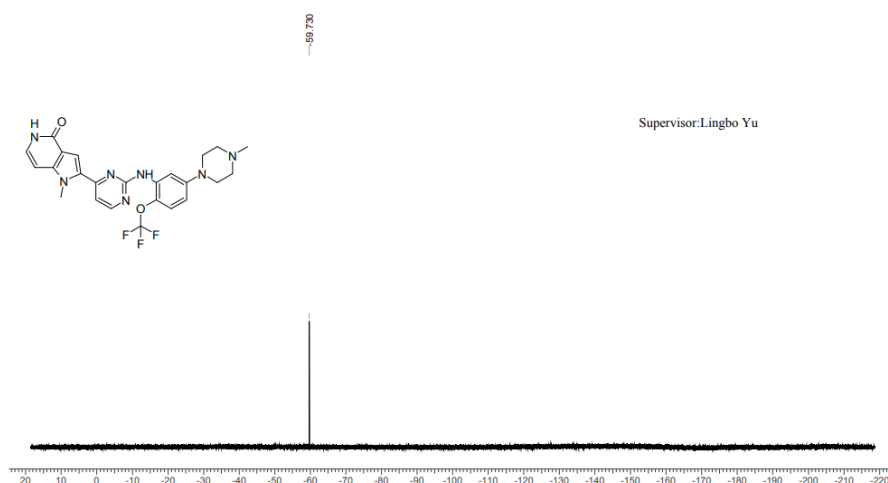

**Figure S12.**  $^{19}\text{F}$  NMR (400 MHz, DMSO) of compound **7a**:  $\delta$  -56.89 ppm.

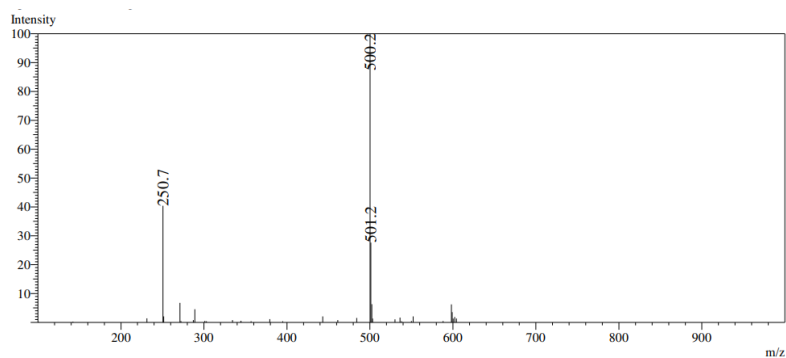

**Figure S13.** Mass spectrum of compound **7a** ( $m/z$  500.2).

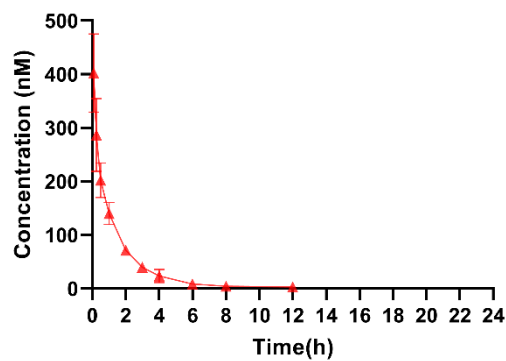

**Figure S14.** Mean concentration-time curves of compound **7a** after intravenous administration in rats (1 mg/kg). Data were presented as mean  $\pm$  SD,  $n=3$ .

**Table S1.** Main pharmacokinetics parameters of compound **7a** after intravenous administration (mean  $\pm$  SD,  $n=3$ ).

|             | $T_{1/2}$ (h) | $C_0$<br>(nmol/L) | $AUC_{0-t}$<br>(h*nmol/L) | $V_{ss}$ (L/kg) | Cl (L/h/kg)   |
|-------------|---------------|-------------------|---------------------------|-----------------|---------------|
| <i>i.v.</i> | $2.4 \pm 0.6$ | $481 \pm 42$      | $472 \pm 32$              | $8.5 \pm 1.3$   | $4.2 \pm 0.3$ |
